# Supplementary material for: Odd–even effect on the thermal properties of Schiff base functionalized dicyanate esters and thermo-mechanical properties of their blends with epoxy resins
Source: Royal Society of Chemistry journal article supplement (doi:10.1039/c5ra14396a), 2015-01-01
Supplement: c5ra14396a1.pdf [file c5ra14396a1.pdf]

## Odd-Even Effect on the Thermal Properties of Schiff base functionalized dicyanate esters and thermo-mechanical properties of their blends with epoxy resins

C.P. Sakthidharan <sup>a, b</sup>, P. R. Sundararajan <sup>b</sup> and M. Sarojadevi <sup>a\*</sup>

<sup>a</sup> Department of Chemistry, CEG, Anna University, Chennai, India – 600 025

<sup>b</sup> Department of Chemistry, Carleton University, 1125 Colonel By Drive, Ottawa, Canada, K1S 5B6

\*Corresponding author: [msrde2000@yahoo.com](mailto:msrde2000@yahoo.com)

### Supplementary Informations

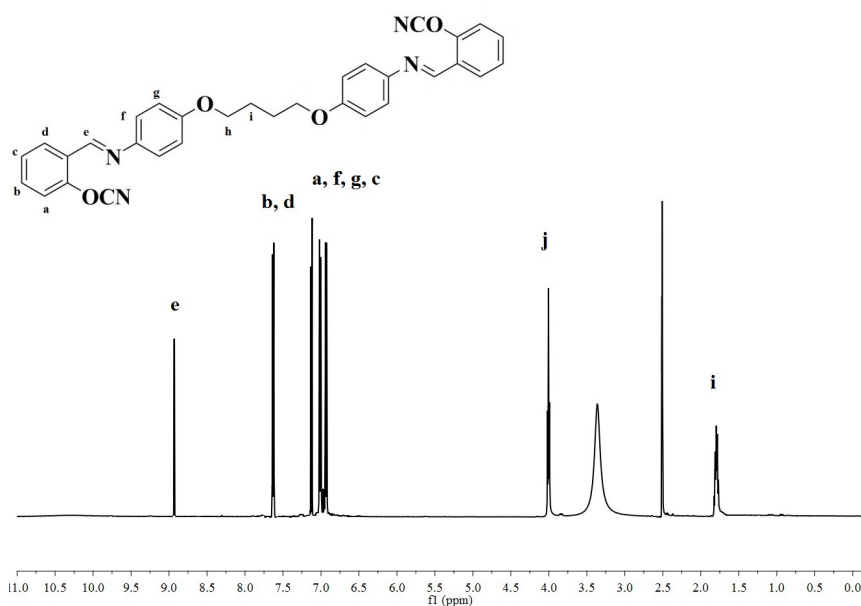

**Fig. S<sub>1</sub>** <sup>1</sup>H-NMR spectrum of the dicyanate ester (4,4'-(butane-1,4-diylbis(oxy))bis(N-(2-cyanatobenzylidene)aniline)) (But-CE)

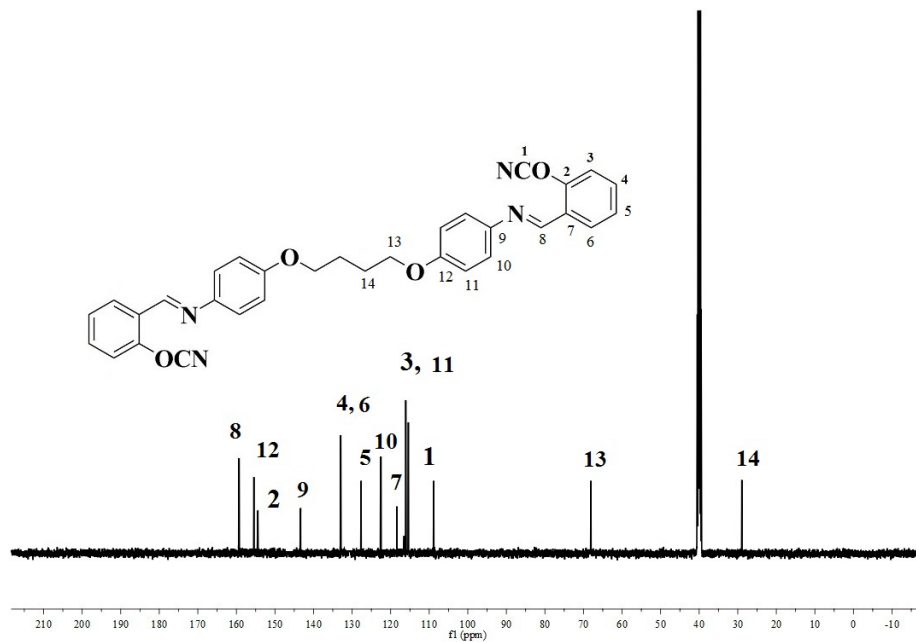

**Fig. S<sub>2</sub>**  $^{13}\text{C}$ -NMR spectrum of the dicyanate ester (4,4'-(butane-1,4-diylbis(oxy))bis(N-(2-cyanatobenzylidene)aniline)) (But-CE)

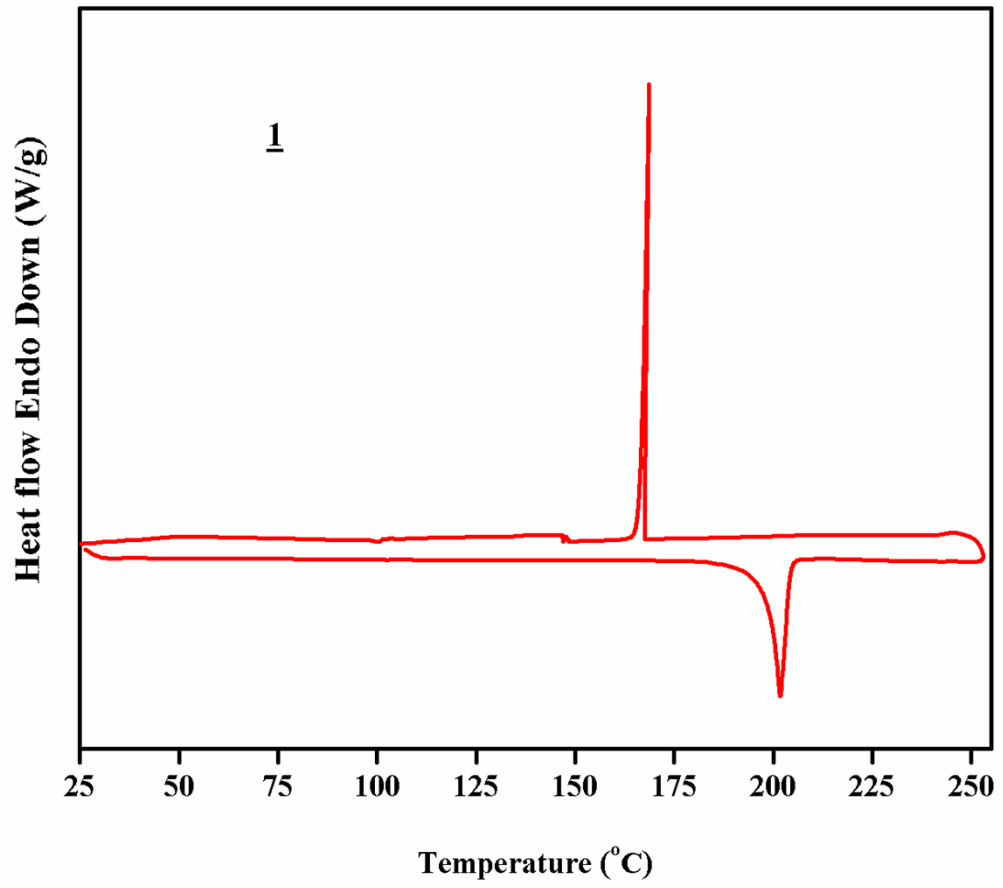

**Fig. S<sub>3</sub>** DSC thermogram of the dicyanate ester (But-CE)

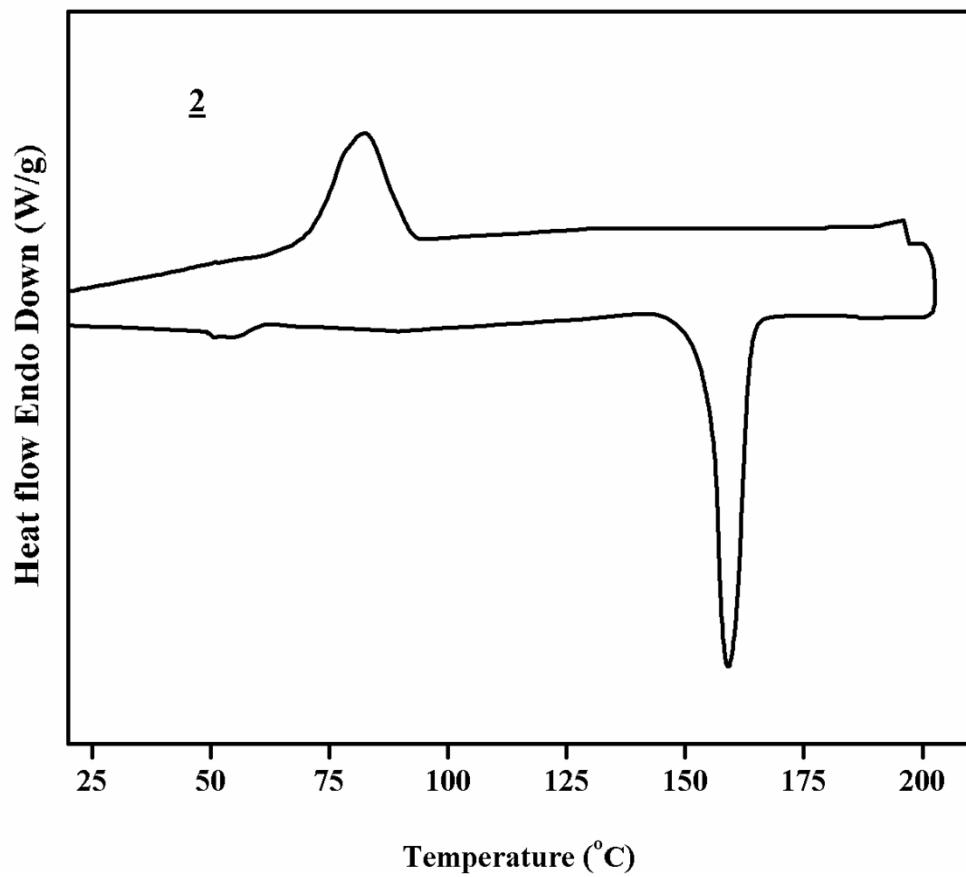

**Fig. S<sub>4</sub>** DSC thermogram of the dicyanate ester (Pen-CE)

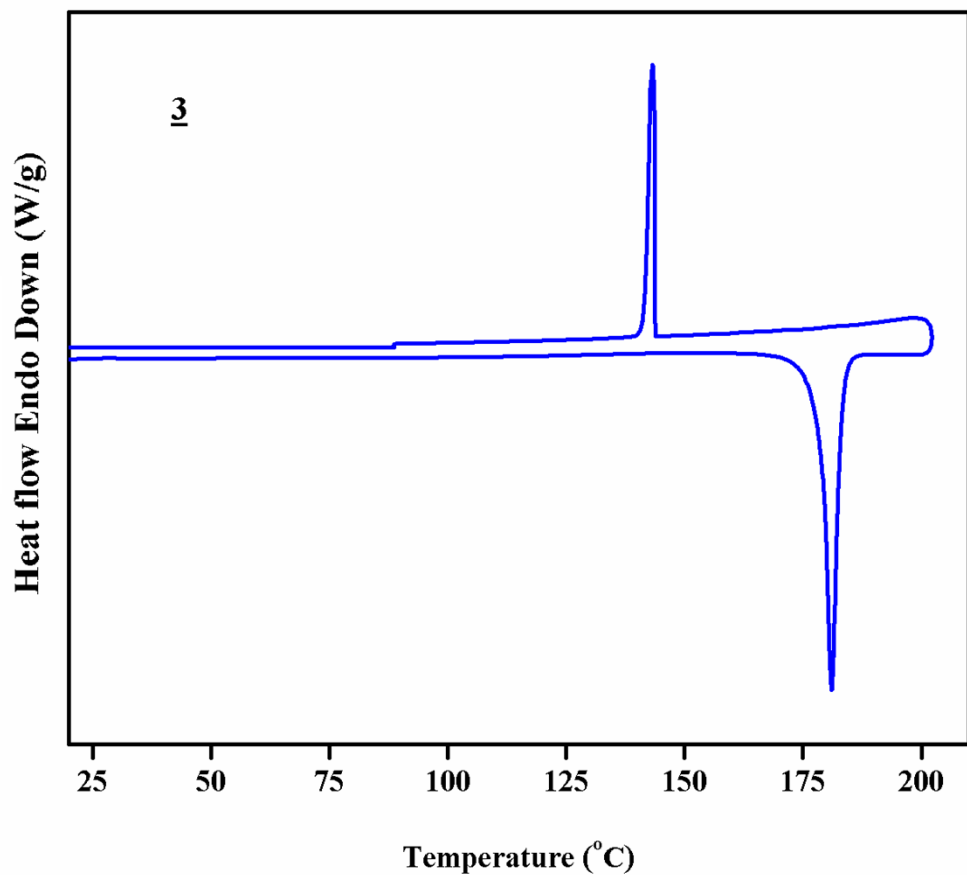

Fig. S<sub>5</sub> DSC thermogram of the dicyanate ester (Hex-CE)

| Name of the Sample | % of cyanate ester content | Storage modulus ( $E'$ ) GPa at 25 °C |
|--------------------|----------------------------|---------------------------------------|
| Neat DGEBA         | 0                          | 5.69                                  |
| But-CE + Epoxy     | 10                         | 3.22                                  |
| Pen-CE + Epoxy     | 10                         | 3.17                                  |
| Hex-CE + Epoxy     | 10                         | 3.04                                  |

S.Table 1. Comparison of storage modulus
